# Supplementary material for: Distinct Functional Alterations and Therapeutic Options of Two Pathological De Novo Variants of the T292 Residue of GABRA1 Identified in Children with Epileptic Encephalopathy and Neurodevelopmental Disorders
Source: MDPI journal article supplement (doi:10.3390/ijms23052723), 2022-03-01
Supplement: s1 [file s1]

## Article

# Distinct Functional Alterations and Therapeutic Options of Two Pathological De Novo Variants of the T292 Residue of GABRA1 Identified in Children with Epileptic Encephalopathy and Neurodevelopmental Disorders

## Supplementary Materials:

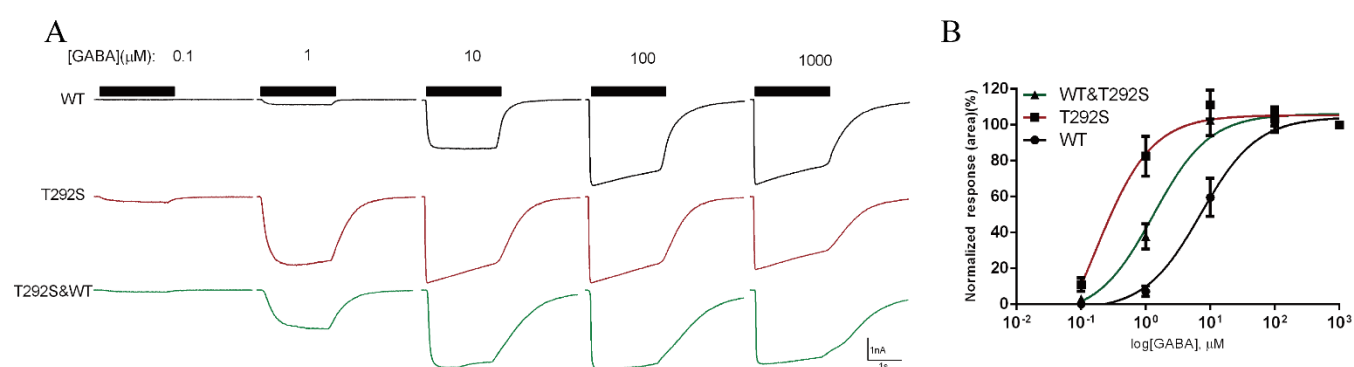

**Figure S1.** Overexpressing mixed GABRA1 subunits ( $\alpha 1_{T292} : \alpha 1_{T292S} : \beta 2 : \gamma 2 = 1:1:2:1$ ) in HEK293 cells to mimic heterozygous status in patient. **(A)** Representative trace of GABA-evoked currents of WT (black),  $\alpha 1_{T292S}$  GABA<sub>A</sub>R (red) and mixed expression of  $\alpha 1_{T292}\alpha 1_{T292S}\beta 2\gamma 2$  (green). **(B)** Dose-response curve of WT ( $n = 10$ ),  $\alpha 1_{T292S}$  GABA<sub>A</sub>R ( $n = 8$ ) and mixed expression of  $\alpha 1_{T292}\alpha 1_{T292S}\beta 2\gamma 2$  ( $n = 8$ ).

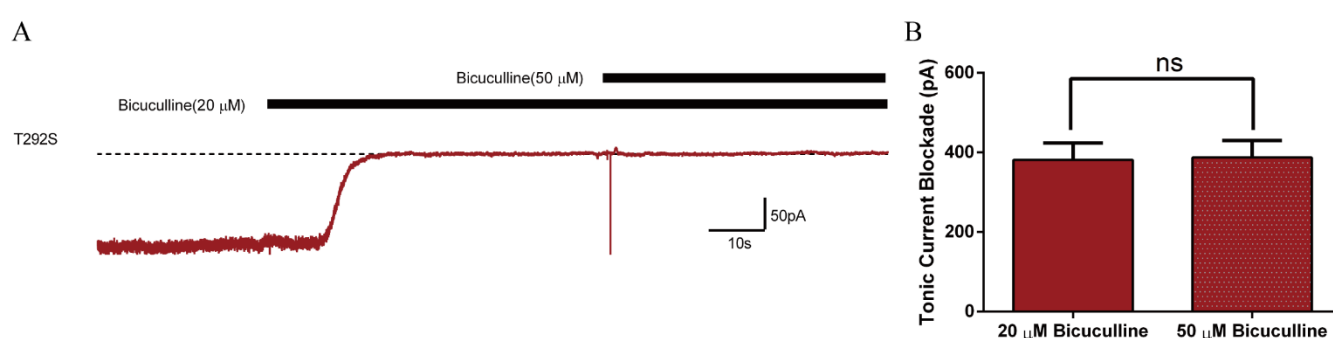

**Figure S2.** Higher concentration bicuculline could not further block tonic current of  $\alpha 1_{T292S}$  GABA<sub>A</sub>R **(A)** Representative trace of 20 μM and 50 μM bicuculline blocked tonic current of  $\alpha 1_{T292S}$  GABA<sub>A</sub>R. **(B)** Quantification of tonic current blocked by 20 μM and 50 μM bicuculline of  $\alpha 1_{T292S}$  ( $n = 7$ ) of GABA<sub>A</sub>R. Statistical differences were determined using unpaired t-test (ns = not significant).

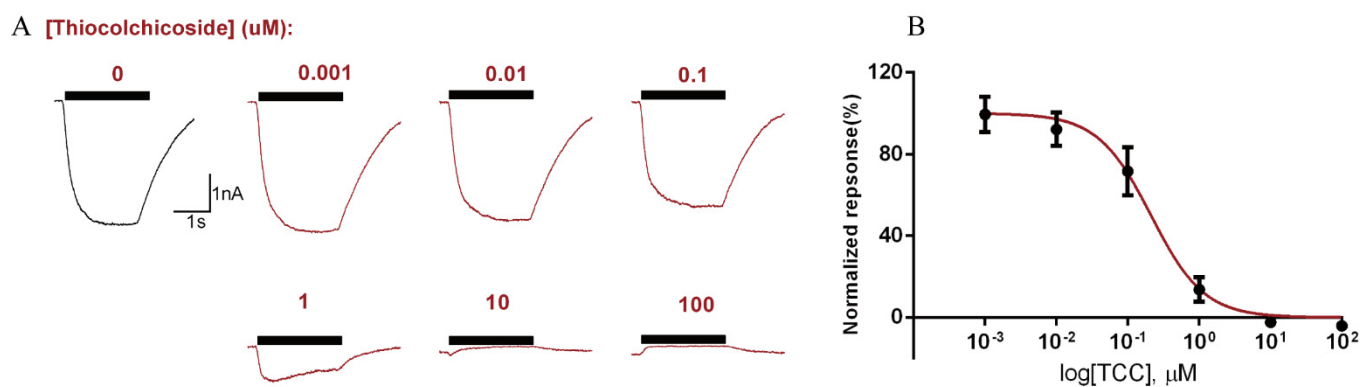

**Figure S3.** (A) Representative trace and (B) dose-response curve of TCC on  $1\mu\text{M}$  GABA-evoked current to determine the optimal concentration of thiocolchicoside to restore the GABA-evoked currents of T292S GABA $\text{A}$ Rs to the wild-type level.
